# Supplementary material for: Preclinical Efficacy of Pro- and Anti-Angiogenic Peptide Hydrogels to Treat Age-Related Macular Degeneration
Source: MDPI journal article supplement (doi:10.3390/bioengineering8120190), 2021-11-23
Supplement: s1 [file s1]

## Supplementary Materials

The supplementary material contains HPLC traces for the pro- and anti-angiogenic peptides, as well as body weight changes between experimental groups.

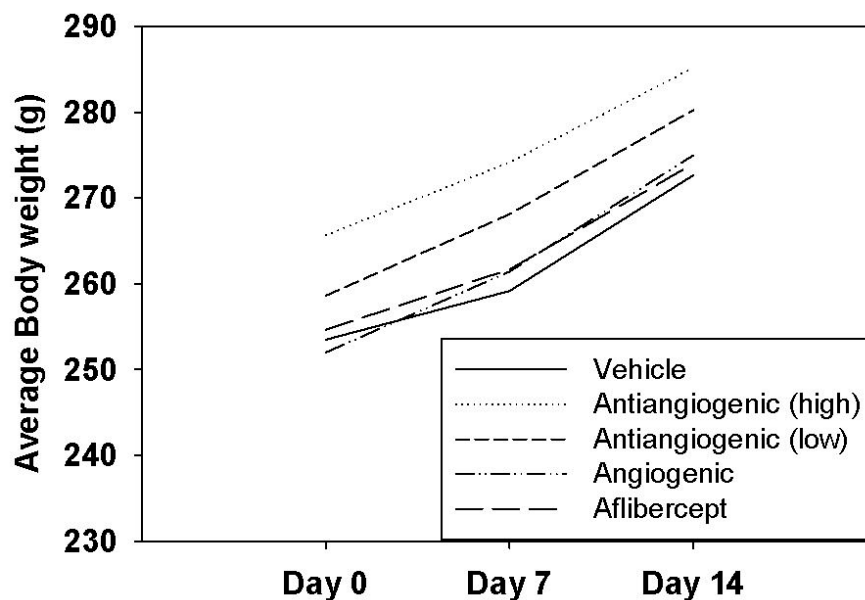

**Supplemental Figure 1.** Body weight changes between experimental groups. No effect of treatment ( $P = 0.542$ ) on body weight among experimental groups: vehicle, anti-angiogenic peptide hydrogel (high), anti-angiogenic peptide hydrogel (low), pro-angiogenic peptide hydrogel, and Aflibercept. No significant effects of treatment on body weight were found through Two-Way Repeated Measures ANOVA comparison.

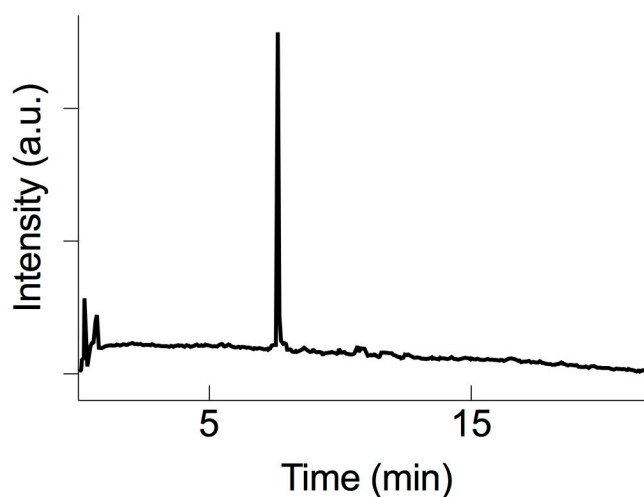

**Supplemental Figure 2.** High Performance Liquid Chromatography (HPLC) UV trace for pro-angiogenic peptide, monitored at 280 nm.

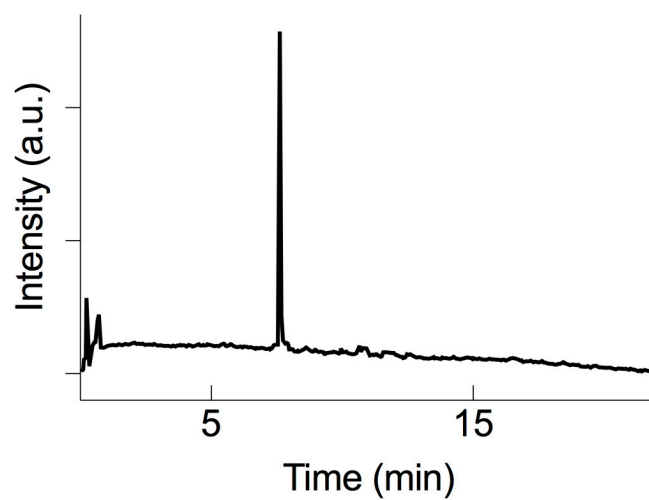

**Supplemental Figure 3.** High Performance Liquid Chromatography (HPLC) UV trace for anti-angiogenic peptide, monitored at 280 nm.
